# Supplementary material for: Insights into the natural history of metachromatic leukodystrophy from interviews with caregivers
Source: Springer Nature journal article supplement (doi:10.1186/s13023-019-1060-2), 2019-04-29
Supplement: MOESM1 [file 16685232]

### Diagnostic journey (prediagnosis)

| Code number              | Code label             | Code description                                                                                                              |
|--------------------------|------------------------|-------------------------------------------------------------------------------------------------------------------------------|
| <b>Diagnosis process</b> |                        |                                                                                                                               |
| 02-01-01                 | Age at diagnosis       | Age of child when he or she received MLD diagnosis                                                                            |
| 02-01-02                 | Time to diagnosis      | Length of time between first seeking medical help or advice to final MLD diagnosis                                            |
| 02-01-03                 | Misdiagnosis           | Misdiagnoses received from HCPs before MLD diagnosis                                                                          |
| 02-01-04                 | HCPs seen prediagnosis | HCPs seen leading up to diagnosis                                                                                             |
| 02-01-05                 | HCPs seen at diagnosis | HCP who made MLD diagnosis                                                                                                    |
| 02-01-06                 | Services used          | Tests or procedures undergone, treatments received and services used (e.g. hospitalization) leading up to diagnosis           |
| <b>Symptoms</b>          |                        |                                                                                                                               |
| 02-02-01                 | Initial symptom        | First symptom, or first combination of symptoms, that occurred or were noticed before diagnosis                               |
| 02-02-02                 | Subsequent symptoms    | Other symptoms that occurred or were noticed after the first symptoms before diagnosis                                        |
| 02-02-03                 | Red flag               | Key symptom or event that alerted the caregiver that something was wrong or that prompted them to seek medical advice or help |
| <b>Financial impact</b>  |                        |                                                                                                                               |
| 02-03-01                 | Costs                  | Nature and impact of any costs incurred leading up to diagnosis                                                               |

HCP, healthcare professional; MLD, metachromatic leukodystrophy

### Disease progression

| Code number                 | Code label   | Code description                                 |
|-----------------------------|--------------|--------------------------------------------------|
| <b>Gross motor symptoms</b> |              |                                                  |
| 03-01-01                    | Head control | Able to support and control own head             |
| 03-01-02                    | Rolling      | Rolling over from front to back or back to front |
| 03-01-03                    | Sitting      | Holding a sitting position                       |
| 03-01-04                    | Crawling     | Crawling on hands and knees                      |

|                                        |                                        |                                                                                                                                                                       |
|----------------------------------------|----------------------------------------|-----------------------------------------------------------------------------------------------------------------------------------------------------------------------|
| 03-01-05                               | Standing                               | Pulling self to a standing position; bearing own weight on legs                                                                                                       |
| 03-01-06                               | Cruising                               | Shuffling along furniture                                                                                                                                             |
| 03-01-07                               | Walking                                | Walking, including going up and down stairs or steps                                                                                                                  |
| 03-01-09                               | Beyond walking                         | Running, playing sports, riding a bike                                                                                                                                |
| 03-01-10                               | Arm movements                          | Moving, lifting or using arms                                                                                                                                         |
| 03-01-08                               | General gross motor symptoms           | Gross motor symptoms that are not specified in detail                                                                                                                 |
| <b>Fine motor and related symptoms</b> |                                        |                                                                                                                                                                       |
| 03-02-01                               | Gripping, grasping, holding            | Holding an object in the hand (e.g. holding a toy, holding hands); closing fingers around an object                                                                   |
| 03-02-02                               | Finger and hand movements              | Picking up or moving objects with fingers (e.g. picking an object up, using buttons); moving fingers and hands                                                        |
| 03-02-03                               | Writing                                | Drawing, colouring, writing or scribbling with a pen or pencil                                                                                                        |
| 03-02-04                               | Swallowing, eating                     | Being able to open mouth, chew and swallow food                                                                                                                       |
| 03-02-05                               | Smiling                                | Using mouth to smile and laugh                                                                                                                                        |
| 03-02-06                               | Eye movement                           | Tracking an object or person from left to right or up and down; intentionally opening and closing eyelids                                                             |
| 03-02-07                               | Involuntary movement                   | Tremor, twitching, shaking                                                                                                                                            |
| 03-02-08                               | General fine motor or related symptoms | Fine motor symptoms that are not specified in detail                                                                                                                  |
| <b>Cognitive symptoms</b>              |                                        |                                                                                                                                                                       |
| 03-03-01                               | Speech                                 | Babbling, talking                                                                                                                                                     |
| 03-03-02                               | Gesturing                              | A bodily action (e.g. moving hand, head, arms, etc.) intended to communicate                                                                                          |
| 03-03-03                               | Reading                                | Reading written language                                                                                                                                              |
| 03-03-04                               | Information processing                 | Understanding and processing information: following instructions, completing tasks, multitasking, recognizing people, awareness of surroundings, academic performance |

|                                                      |                                                   |                                                                                                             |
|------------------------------------------------------|---------------------------------------------------|-------------------------------------------------------------------------------------------------------------|
| 03-03-05                                             | Memory                                            | Remembering and recalling facts and/or past events                                                          |
| 03-03-06                                             | Concentration                                     | Paying attention, focusing on a task                                                                        |
| 03-03-08                                             | Communication                                     | Purposefully communicating wants, preferences, choices, or needs through movement or other non-verbal means |
| 03-03-07                                             | General cognitive symptoms                        | Cognitive symptoms that are not specified in detail                                                         |
| <b>Social, emotional and/or behavioural symptoms</b> |                                                   |                                                                                                             |
| 03-04-01                                             | Interacting or playing with others                | Reciprocal play, taking turns, initiating and maintaining conversation                                      |
| 03-04-02                                             | Social engagement                                 | Reacting and responding, positively seeking social interaction, withdrawing                                 |
| 03-04-03                                             | Emotions                                          | Bad temper, moods, aggression, sadness                                                                      |
| 03-04-04                                             | Incongruent emotions                              | Inappropriate, unusual or excessive expressions of emotion (e.g. crying, smiling, laughing)                 |
| 03-04-05                                             | Socially inappropriate behaviour                  | Behaviours that are socially undesirable or inappropriate (e.g. lack of inhibition, biting)                 |
| 03-04-07                                             | Affective symptoms                                | Anxiety, depression or psychotic problems (e.g. hallucinations)                                             |
| 03-04-06                                             | General social, emotional or behavioural symptoms | Behaviours that are social, emotional or behavioural in nature but are not specified in detail              |
| <b>Other symptoms</b>                                |                                                   |                                                                                                             |
| 03-05-06                                             | Muscle symptoms                                   | Spasms, spasticity, tightness, hypertonia, hypotonia, cramps                                                |
| 03-05-04                                             | Pain                                              | Pain or discomfort                                                                                          |
| 03-05-02                                             | Seizures                                          | Seizures                                                                                                    |
| 03-05-03                                             | Toileting                                         | Bladder and bowel control, bowel movements or constipation                                                  |
| 03-05-07                                             | Self-care functioning                             | Being able to dress, wash and feed self                                                                     |
| 03-05-05                                             | Vision and hearing                                | Being able to see and hear                                                                                  |
| 03-05-01                                             | Other symptoms                                    | Any other symptoms not included in coded themes                                                             |

MLD, metachromatic leukodystrophy
